# Supplementary material for: Access to COVID-19 testing by individuals with housing insecurity during the early days of the COVID-19 pandemic in the United States: a scoping review
Source: Front Public Health. 2023 Sep 28;11:1237066. doi: 10.3389/fpubh.2023.1237066 (PMC10568314; doi:10.3389/fpubh.2023.1237066)
Supplement: Supplementary file 2 [file Table_2.XLSX]

## Sheet: Table S2
Reference	Title	Description
8. Knight 2022	COVID-19 Testing and Vaccine Acceptability Among Homeless-Experienced Adults: Qualitative Data from Two Samples	Attitude of people experiencing homelessness (PEH) and homeless-experienced individuals towards COVID-19 testing and vaccination, and their and their willingness to accept such interventions.
9. Kanamori 2021	Why re-invent the wheel? Social network approaches can be used to mitigate sars-cov-2 related disparities in latinx seasonal farmworkers	Challenges to pandemic tracking, treatment, and acceptance of vaccination among Latinx seasonal farmworkers and to explore how social network approaches have been successfully utilized among this community and may be tailored as a strategy to overcome the aforementioned challenges.
10. Hagan 2020	Mass Testing for SARS-CoV-2 in 16 Prisons and Jails - Six Jurisdictions, United States, April-May 2020	SARS-CoV-2 prevalence among incarcerated and detained persons by analyzing data from 15 jurisdictions describing results of mass testing events among this population and cases identified through earlier symptom-based testing.
11. Behbahani 2020	Vulnerable Immigrant Populations in the New York Metropolitan Area and COVID-19: Lessons Learned in the Epicenter of the Crisis	Focused on Latinos in Newark, New Jersey faced during the COVID-19 pandemic and provide insight into the role that strategic partnerships between academic institutions and community-based organizations (CBOs) can play in helping address those challenges.
12. Rubio 2021	The COVID-19 Symptom to Isolation Cascade in a Latinx Community: A Call to Action	Use of symptom to isolation cascade and to identify actionable steps to improve the overall effectiveness of testing in a predominantly Latinx population participating in community testing.
13. Wadhwa 2021	Identification of Presymptomatic and Asymptomatic Cases Using Cohort-Based Testing Approaches at a Large Correctional Facilityâ€”Chicago, Illinois, USA, May 2020	Evaluate the utility of serial testing and to describe symptomology among persons identified during the investigation.
15. Lechuga 2022	Latinx Immigrants' Legal Concerns About SARS-CoV-2 Testing and COVID-19 Diagnosis and Treatment	Address gaps in prior research by investigating Latinx immigrants' perceptions of the availability of COVID-19-related testing and treatment services and the potential immigration ramifications of utilizing them.
16. Gehlbach 2021	COVID-19 Testing and Vaccine Hesitancy in Latinx Farm-Working Communities in The Eastern Coachella Valley	Support delivery of COVID-19 testing services, broadly disseminate COVID-19 public health information, and conduct research on COVID-19 perceptions; this was done with a focus on Latinx immigrants in rural agricultural communities.
17. Davlantes 2022	Mitigating SARS-CoV-2 Transmission in Hispanic and Latino Communities-Prince William Health District, Virginia, June 2020	Rapid, multi-pronged method of assessing the needs and limitations of Prince William Health District's (PWHD) Hispanic or Latino residents during the COVID-19 pandemic.
18. Alarcon 2021	Adapting Backpack Medicine in COVID-19 Response for People Experiencing Homelessness in Southern California	Outreach program delivering medicine through the Backpack Medicine Program (BPM) COVID Response Team at Ventura County Medical Center.
19. Murphy 2021	A Community-Adapted Approach to SARS-CoV-2 Testing for Medically Underserved Populations, Rhode Island, USA	Implementation of a culturally-tailored testing center for neighborhoods with high proportions of Latinx individuals and high rates of COVID-19.
20. Aranda-Diaz 2022	Implementation of rapid and frequent SARS-CoV2 antigen testing and response in congregate homeless shelters	Shelter Pilot, a voluntary rapid, twice-weekly testing protocol for congregate homeless shelters in San Francisco, California during January and February 2021. The RE-AIM framework (Reach, Effectiveness, Adoption, Implementation and Maintenance) was applied to evaluate the uptake and effectiveness of the BinaxNOW Shelter Pilot and inform recommendations to scale up similar protocols.
21. Barry 2020	Responding to COVID-19 in an Uninsured Hispanic/Latino Community: Testing, Education and Telehealth at a Free Clinic in Providence	Clinica Esperanza/Hope Clinic (CEHC) in Rhode Island program in expanding access to public health information about COVID-19, testing and other healthcare access during the first six months of the pandemic.
22. Bigelow 2021	Community Testing and SARS-CoV-2 Rates for Latinxs in Baltimore	Community testing events aimed at improving access to SARS-CoV-2 testing for underserved Latinx immigrants.
23. Chan 2021	COVID-19 in the New York City Jail System: Epidemiology and Health Care Response, March-April 2020	Approach to COVID-19 outbreak in a large urban jail system, including assessment of signs and symptoms at time of testing and risk factors for hospitalization.
24. Chidavaenzi 2022	Implementation of a COVID-19 Screening Testing Program in a Rural, Tribal Nation: Experience of the San Carlos Apache Tribe, January-February 2021	Implementation of a serial rapid antigen testing program based in 2 casinos and 1 detention center in the San Carlos Apache Indian Reservation.
25. Corwin 2021	A Mobile Primary Care Clinic Mitigates an Early COVID-19 Outbreak Among Migrant Farmworkers in Iowa	Mobile outreach of community health center that focuses on migrant and seasonal farmworkers, and in particular describe an outbreak in a rural farm in Iowa
26. Dunne 2021	COVID-19 Outbreaks in Correctional Facilities with Work-Release Programs - Idaho, July-November 2020	COVID-19 outbreaks in five Idaho Department of Correction (IDOC) facilities with work-release programs,with study focus on the mitigation strategies that IDOC implemented and collaborative public health response.
27. Eliaz 2022	Evaluating the Impact of Language Concordance on Coronavirus Disease 2019 Contact Tracing Outcomes among Spanish-Speaking Adults in San Francisco between June and November 2020	Evaluate whether language concordance was associated with likelihood of contact tracing interview completion, follow-up, COVID-19 testing and access to isolation and quarantine support services among Spanish-speaking adults in San Francisco.
28. Galletly 2021	Assessment of COVID-19-Related Immigration Concerns Among Latinx Immigrants in the US	Examine the proportions of Latinx immigrants who endorse statements about the potential negative immigration ramifications of seeking and using COVID-19-related testing and treatment services and engaging in contact tracing.
29. Ghinai 2020	Risk Factors for Severe Acute Respiratory Syndrome Coronavirus 2 Infection in Homeless Shelters in Chicago, Illinois-March-May, 2020	Prevalence of COVID-19, spectrum of illness and identify individual- and facility-level risk factors for SARS-CoV-2 infection in 21 homeless shelters across Chicago, Illinois.
30. Gibson 2020	NCCHC Survey Yields Insights Into COVID-19 in U.S. Correctional Facilities	Examine COVID-19 impact on correctional facilities around the United States.
31. Hershow 2021	Rapid Spread of SARS-CoV-2 in a State Prison After Introduction by Newly Transferred Incarcerated Persons - Wisconsin, August 14-October 22, 2020	COVID-19 outbreak in a Wisconsin state prison, with focus on strategies and approaches.
32. Imbert 2021	Coronavirus Disease 2019 Outbreak in a San Francisco Homeless Shelter	Report the public health response to a COVID-19 outbreak in a San Francisco shelter.
33. Kerkhoff 2020	Evaluation of a novel community-based COVID-19 'Test-to-Care' model for low-income populations	Development and evaluation of a novel, community-based approach (Test-to-Care Model) designed to address the barriers faced by socioeconomically vulnerable individuals in the Latino community with newly diagnosed COVID-19 and their households.
34. Matthew 2021	The Novel Coronavirus and Undocumented Farmworkers in the United States	Undocumented farmworkers in the context of the current global pandemic and possible risk mitigation strategies.
35. Molyneux 2021	95 Experiences of Detained Asylum Seekers During the COVID-19 Pandemic	Study aimed at detailing experiences of detained asylum seekers during the pandemic and to provide insight into COVID-19's impact on this population.
36. Natoli 2021	Incarceration and COVID-19: Recommendations to Curb COVID-19 Disease Transmission in Prison Facilities and Surrounding Communities	Disparities and disadvantages experience by inmates and make recommendations to combat future COVID-19 outbreaks in prisons and surrounding communities where prisoners are released.
37. Nelson 2020	A COVID-19 crisis in US jails and prisons	Early day experience of the COVID-19 crisis in US jails and prisons addressing lack of COVID-19 testing and racial disparity withing the jail system.
38. Pirraglia 2021	COVID-19 mitigation for high-risk populations in Springfield Massachusetts USA: a health systems approach	Mitigation program in Springfield, MA, a health system's response to addressing inequities driven by COVID-19.
39. Rocha 2021	The Impact of the COVID-19 Pandemic on the Brazilian Immigrant Community in the U.S: Results from a Qualitative Study	Impact of COVID-19 on immigrant communities in the US by conducting a study on the impact of the pandemic on Brazilian immigrants in the Greater Boston area.
40. Qureshi 2022	Implementation of a COVID-19 Infection Control Plan in a Large Urban Jail System	Use of CDC mitigation strategies and the cumulative incidence of COVID-19 in the Los Angeles County Jail (LACJ).
41. Rogers 2021	Characteristics of COVID-19 in Homeless Shelters : A Community-Based Surveillance Study	Surveillance of SARS-CoV-2 case counts across 14 homeless shelters in King County, Washington.
42. Singer 2022	The impact of immigration detention on the health of asylum seekers during the COVID-19 pandemic	Examine detained asylum seekers' perspectives on immigration detention and its impact on their health during the COVID-19 pandemic, seeking to understand the physical and mental health implications that resulted from living conditions this population faced while held in detention centers.
43. Stadnick 2022	Co-creating a Theory of Change to advance COVID-19 testing and vaccine uptake in underserved communities	Use of a Theory of Change process to meaningfully engage community members of underserved communities in two implementation science projects funded by the Community Engagement Alliance Against COVID-19 Disparities and Rapid Acceleration of Diagnostics for Underserved Populations NIH programs aimed at promoting equitable access to COVID-19 testing, vaccination, and inclusion in clinical trials.
44. Marcom 2020	Working along the Continuum: North Carolina's Collaborative Response to COVID-19 for Migrant & Seasonal Farmworkers	Response to the COVID-19 pandemic among migrant and seasonal farmworkers in North Carolina.
45. Wallace 2021	Rapid Transmission of Severe Acute Respiratory Syndrome Coronavirus 2 in Detention Facility, Louisiana, USA, May-June, 2020	COVID-19 outbreak in a detention center in Louisiana (facility X) along with a serial testing strategy.
46. Winterbauer 2021	Qualitative review of promising practices for testing vulnerable populations at off-site COVID-19 testing centers	Approaches and best practices to testing vulnerable populations in off-site COVID-19 testing centers (OSCTCs) using a qualitative approach.
47. Tosh 2021	Migrant detention and COVID-19: pandemic responses in four New Jersey detention centers	Examine the relationship between COVID-19 and immigration detention within New Jersey by presenting the account of the pandemic response in 4 New Jersey facilities where migrants were detained as of March 2021: Bergen, Essex and Hudson County Jails, and Elizabeth Detention Center (EDC).
48. Towns 2020	Rapid deployment of a community-centered mobile Covid 19 testing unit to improve health equity	Implementation of a community-centered mobile COVID-19 testing unit with a focus on Black and Latinx communities in North Carolina.
49. Wilkins 2021	A systems approach to addressing COVID-19 health inequities	Use a systems approach on interdependence and interaction across the health system to address the complex drivers of COVID-19 inequities and rapidly respond to data trends in real time.
50. Lauzardo 2021	An Outbreak of COVID-19 Among H-2A Temporary Agricultural Workers	COVID-19 outbreak in a crew of more than 100 H-2A workers in north central Florida to characterize factors that may contribute to the spread of COVID-19 in this essential workforce.
